# Supplementary material for: Microfluidic paper analytical device for the chromatographic separation of ascorbic acid and dopamine
Source: Royal Society of Chemistry journal article supplement (doi:10.1039/c5ra16272f), 2015-01-01
Supplement: c5ra16272f1.pdf [file c5ra16272f1.pdf]

## Electronic Supporting Information

### Microfluidic Paper Analytical Device for the Chromatographic Separation of Ascorbic Acid and Dopamine

A. Murphy, B. Gorey, K. de Guzman, N. Kelly, E.P. Nesterenko, A. Morrin

School of Chemical Sciences, National Centre for Sensor Research, Dublin City University, Dublin 9, Ireland.

\* Tel: +353 1 700 6730; Fax: +353 1 700 5503; E-mail: [aoife.morrin@dcu.ie](mailto:aoife.morrin@dcu.ie)

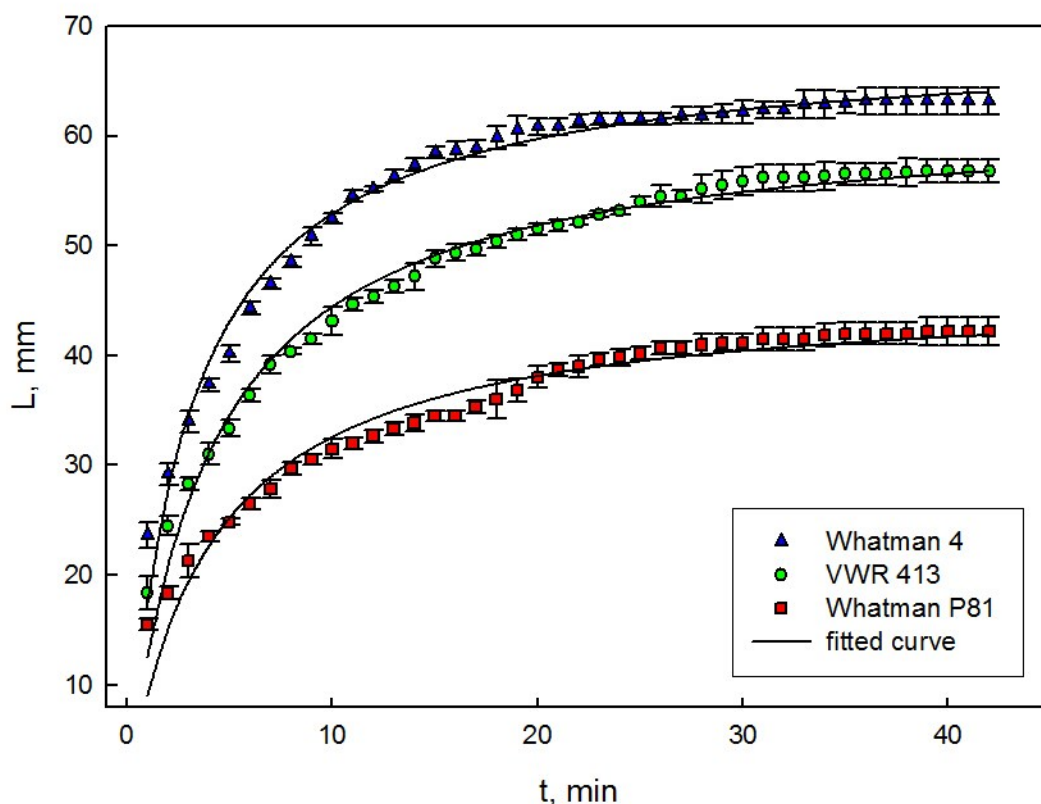

**Figure ESI-1:** Experimental and fitted data for mobile phase distance travelled vs time on the different filter papers used ( $n=3$ ). Curve fitting was done using Equation 2 in manuscript and values for the constants  $a$  and  $b$  were obtained for each filter paper.
